1 **Title: Large-scale gene losses underlie the genome evolution of parasitic plant *Cuscuta***  
2 ***australis***

3 **Authors:** Guiling Sun<sup>1,4‡</sup>, Yuxing Xu<sup>1,2,3‡</sup>, Hui Liu<sup>1‡</sup>, Ting Sun<sup>4</sup>, Jingxiong Zhang<sup>1</sup>, Christian  
4 Hettenhausen<sup>1</sup>, Guojing Shen<sup>1</sup>, Jinfeng Qi<sup>1</sup>, Yan Qin<sup>1</sup>, Jing Li<sup>1</sup>, Lei Wang<sup>1</sup>, Wei Chang<sup>1</sup>,  
5 Zhenhua Guo<sup>2</sup>, Ian T. Baldwin<sup>5</sup>, and Jianqiang Wu<sup>1,\*</sup>

6 **Affiliations:**

7 <sup>1</sup>Department of Economic Plants and Biotechnology, Yunnan Key Laboratory for Wild Plant  
8 Resources and <sup>2</sup>the Germplasm Bank of Wild Species, Kunming Institute of Botany, Chinese  
9 Academy of Sciences, Kunming 650201, China.

10 <sup>3</sup>University of Chinese Academy of Sciences, Beijing 100049, China.

11 <sup>4</sup>Institute of Plant Stress Biology, State Key Laboratory of Cotton Biology, Department of  
12 Biology, Henan University, Kaifeng 475001, China.

13 <sup>5</sup>Max Planck Institute for Chemical Ecology, Jena 07745, Germany.

14 ‡These authors contributed equally.

15 \* Correspondence and requests for materials should be addressed to J.W.  
16 (wujianqiang@mail.kib.ac.cn).

17

1 **Dodders (*Cuscuta* spp., Convolvulaceae) are root- and leafless parasitic plants. The**  
2 **physiology, ecology, and evolution of these obligate parasites are poorly understood. A**  
3 **high-quality reference genome of *Cuscuta australis* was assembled. Our analyses reveal**  
4 **that *Cuscuta* experienced accelerated molecular evolution, and *Cuscuta* and the**  
5 **convolvulaceous morning glory (*Ipomoea*) shared a common whole-genome triplication**  
6 **event before their divergence. *C. australis* genome harbors 19671 protein-coding genes,**  
7 **and importantly, 11.7% of the conserved orthologs in autotrophic plants are lost in *C.***  
8 ***australis*. Many of these gene loss events likely result from its parasitic lifestyle and the**  
9 **massive changes of its body plan. Moreover, comparison of the gene expression patterns**  
10 **in *Cuscuta* prehaustoria/haustoria and various tissues of closely related autotrophic**  
11 **plants suggests that *Cuscuta* haustorium formation requires mostly genes normally**  
12 **involved in root development. The *C. australis* genome provides important resources for**  
13 **studying the evolution of parasitism, regressive evolution, and evo-devo in plant**  
14 **parasites.**

## 15 **Introduction**

16 About 1% of the flowering plants are haustorial parasites<sup>1</sup>, and some are responsible  
17 for severe yield losses in many crops. Although the evolutionary history of plant parasitism  
18 remains elusive, all parasitic plants, except the mycoheterotrophs, use a specialized haustorial  
19 organ to extract water and nutrients through vascular connections with the hosts<sup>2</sup>. The  
20 *Cuscuta* spp. (dodders) are typical obligate shoot parasites widely distributed worldwide  
21 comprising ~ 194 species, and is the only genus of parasites in Convolvulaceae (Solanales).  
22 *Cuscuta* spp. exhibit massive changes of their body plans, being leaf- and rootless throughout  
23 their lifecycles (Fig. 1a). They contain trace amounts of chlorophyll, but cannot sustain  
24 themselves from their own photosynthesis. Although whether *Cuscuta* plants are hemi- or

1 holoparasites remains debatable, they could be considered to be transitioning from  
2 hemiparasitism to holoparasitism. Through haustoria, dodders not only obtain water and  
3 nutrients, but secondary metabolites, mRNAs, and proteins from their host plants<sup>3-5</sup>. These  
4 features make *Cuscuta* an important model to elucidate plant-parasite interactions and the  
5 evolution of plant parasites.

6 Here we sequence the genome of *Cuscuta australis*. Our analyses reveal that the  
7 genome of *Cuscuta australis* experienced massive gene losses, including important genes  
8 involved in leaf and root development, flowering time control, as well as defense against  
9 pathogens and insects. Comparison of *Cuscuta* haustorium/prehaustorium gene expression  
10 patterns with the tissues from closely related autotrophic plants suggests that *Cuscuta*  
11 haustorium formation likely requires genes that are normally involved in root development.

## 12 **Results**

### 13 **Genome assembly**

14 The genome size of *Cuscuta australis* was estimated to be 272.57 Mb from *k*-mer  
15 analysis. We next generated 26.6 Gb (97.6-fold coverage) of *C. australis* genome sequences  
16 from a single-molecule real-time (SMRT) sequencing platform. The *C. australis* genome  
17 sequence includes 249 contigs (N50 = 3.63 Mb), and these contigs were further assembled to  
18 form 103 scaffolds (N50 = 5.95 Mb; Supplementary Table 1). In total, 264.83 Mb (219  
19 contigs) of nuclear sequences (97.16% of the estimated genome size) and 1.9 Mb (30 contigs)  
20 of organellar sequences were acquired (Supplementary Table 2). The accuracy and  
21 heterozygosity were estimated to be 99.99% and 0.013%, respectively (Supplementary Table  
22 3). A total of 155 Mb of repetitive elements were identified in the *C. australis* nuclear  
23 genome (Supplementary Table 4). Comparison with *Ipomoea nil* (Japanese morning glory;  
24 also Convolvulaceae), which is relatively closely related, indicated similar proportions of

1 different types of repetitive elements between the two genomes (Supplementary Table 4),  
2 although the *I. nil* genome contains many more repeats (Supplementary Table 4), consistent  
3 with its larger genome size (734 Mb). LTR retrotransposons are the most dominant type of  
4 repeats in both *C. australis* and *I. nil* (Supplementary Table 4), and we specifically inspected  
5 the *LTR/Gypsy* and *LTR/Copia* superfamilies. These two genomes exhibit large differences in  
6 *LTR/Gypsy* (84,083 in *I. nil* and 24,453 in *C. australis*) and *LTR/Copia* (96,355 in *I. nil* and  
7 43,853 in *C. australis*) copy numbers; moreover, the sequences of *LTR/Gypsy* and *LTR/Copia*  
8 members have also diverged as revealed by phylogenetic analysis (Supplementary Fig. 1).

9         Based on *de novo* gene structure prediction, homology comparison, and transcript  
10 data of both *C. australis* and the closely-related relative *C. pentagona*<sup>6</sup>, 19671 genes could be  
11 annotated.

## 12 **Phylogeny analysis**

13         The phylogenetic position of *Cuscuta* was determined using 1796 one-to-one  
14 orthogroups (Supplementary Data 1b) identified from *C. australis*, *Arabidopsis thaliana*, and  
15 six lamiids plants – the Solanales *Ipomoea nil*, *Solanum tuberosum* (potato), *Solanum*  
16 *lycopersicum* (tomato), and *Capsicum annuum* (pepper), the Gentianales *Coffea canephora*  
17 (coffee), and the Lamiales *Mimulus guttatus* (monkey flower) (for simplicity, these seven  
18 autotrophic species are collectively named 7Ref-Species). Consistent with their phylogenetic  
19 relationship, *Cuscuta* forms a sister group with *Ipomoea*, and we estimated that these two  
20 lineages split ~ 33 million years ago (Supplementary Fig. 2). Notably, *Cuscuta* shows a much  
21 longer branch than does *Ipomoea* (Fig. 1b), providing genome-wide evidence consistent with  
22 the hypothesis that parasitic plants evolve rapidly<sup>7,8</sup>. This result is statistically significant by  
23 both two cluster analysis and relative rate test (Supplementary Table 5 and Supplementary  
24 Table 6). Previously, a whole-genome duplication (WGD) event was detected in *Ipomoea*<sup>9</sup>.

1 The syntenic blocks and trees of the syntenic gene groups of *Cuscuta* and *Ipomoea* vs *Coffea*  
2 genome indicate that *Cuscuta* and *Ipomoea* experienced a whole-genome triplication event  
3 before their divergence from a common ancestor (Fig. 1c, d, Supplementary Fig. 3 to 5,  
4 Supplementary Table 7).

## 5 **Contractions and expansions of gene families**

6 Parasitism and large changes of body plan in *Cuscuta* suggest that many gene families  
7 might have experienced substantial alterations in sizes, including those that function in leaf  
8 and root physiology. To study gene family expansion and contraction, a rigorous  
9 bioinformatic pipeline was adopted to identify gene families (details see Supplementary Note  
10 5). In addition, the genome of *Utricularia gibba* (Lentibulariaceae; an aquatic carnivorous  
11 bladderwort plant) was included in the analysis, given that *U. gibba* also exhibits large  
12 changes in body plan (e. g. no true roots). We identified a total of 13981 gene families in *C.*  
13 *australis*, *U. gibba*, and the 7Ref-Species (Supplementary Data 1a); among these, 1256 and  
14 478 families in *C. australis* and 605 and 848 families in *U. gibba* were found to have had  
15 significant contractions and expansions, respectively, revealed by a maximum-likelihood  
16 analysis (Fig. 2a; Supplementary Data 1a). Moreover, box plots of the *F*-indices (details see  
17 Supplementary Note 5), which describe the differences among the gene numbers of the  
18 conserved gene families in the 7Ref-Species (namely, in *Arabidopsis* and at least five of the  
19 six remaining autotrophic species), indicate that in *C. australis* and *U. gibba*, gene numbers  
20 in 72 and 62% of the conserved gene families are below the averages, respectively (Fig. 2b).

## 21 **Overall gene losses**

22 The drastic contractions of gene families in *C. australis* and *U. gibba* suggest  
23 considerable gene losses in their genomes. Next, BUSCO analyses<sup>10</sup> was carried out to map

1 the 1440 conserved orthologs in land plants to the genomes of 7Ref-Species, *C. australis*, and  
2 *U. gibba*. Consistent with their contracted gene families, the missing BUSCOs in *C. australis*  
3 and *U. gibba* (16.30% and 13.70%, respectively) are more than those in the 7Ref-Species  
4 (1.40% to 8.50%) (Supplementary Table 8).

5 To identify specific orthologous genes that are lost in *C. australis* and *U. gibba*, we  
6 developed a stringent genome-wide analysis pipeline to divide each gene family into small  
7 orthogroups using a method combining phylogenetic and syntenic analysis (details see  
8 Supplementary Note 6) and the functional annotations were assigned using *Arabidopsis* as the  
9 reference (Supplementary Fig. 6). This analysis resulted in 21487 orthogroups  
10 (Supplementary Data 1b). Among the 11995 conserved orthogroups in the 7Ref-Species,  
11 there are 1402 and 1555 orthogroups whose *C. australis* and *U. gibba* members are absent,  
12 respectively (Supplementary Data 1b and 1c). Strikingly, 563 orthogroups have no *C.*  
13 *australis* and *U. gibba* orthologs, whose functions include phytohormone pathways, nutrient  
14 uptake, defense response, and root hair development (Supplementary Data 2a); 839  
15 orthogroups specifically lost their members in *C. australis*, and these genes are mainly  
16 involved in response to light, photosynthesis, chloroplast RNA processing, and adventitious  
17 root development (Supplementary Data 2b); 992 orthogroups specifically have no members  
18 of *U. gibba*, and genes in these orthogroups are involved in signaling, response to stimuli,  
19 and protein modifications, among others (Supplementary Data 2c). In addition to the lost  
20 genes, in *C. australis* genome we identified 1168 pseudogenes, which contain frame-shifts or  
21 premature stop codons. Among these, we found five flowering time-related genes and 13  
22 photosynthesis-related genes (Supplementary Data 3a).

23 We next inspected the tissue-specific expression patterns of the *S. lycopersicum* and *I.*  
24 *nil* (the closest autotrophs to *Cuscuta* among the 7Ref-Species) orthologs in the 1402

1 orthogroups, whose *Cuscuta* members are lost (Supplementary Data 1d). It was found that  
2 these orthologs' principally expressed tissues (the tissues, in which the expression levels of a  
3 given gene are at least 1-fold greater than the averages of its expression levels in other  
4 tissues, are defined as the principally expressed tissues for that gene) are the leaves and root  
5 of both *S. lycopersicum* and *I. nil* (Fig. 3a). These data are consistent with the leaf- and  
6 rootless body plan of *Cuscuta*.

### 7 **Loss of genes for leaf and root development**

8 Next, the *C. australis* genome was specifically searched for genes that mediate leaf  
9 and root development, and it was found that a number of important genes involved in leaf  
10 and/or root development are absent (Supplementary Data 1c): The orthologs of 1) *LCR* (leaf  
11 shape and vein formation); 2) *TRNI/LOPI* (leaf patterning and lateral root development); 3)  
12 *PLT1*, 2, and 5 (specification of root stem cell niche); 4) *SMB* (lateral root cap maturation); 5)  
13 all the *CASP* genes which are required for Casparian strip formation; 6) *WAK1* to 5 (root cell  
14 expansion); 7) *WOX3*, 5, and 7 (embryonic patterning, stem cell maintenance, and organ  
15 formation).

### 16 **Loss of genes for nutrient uptake**

17 We found that many genes involved in potassium (K), phosphate (P), and nitrate (N)  
18 uptake from soil are lost in *C. australis*. For K<sup>+</sup> uptake: the orthologs of *HAK5* (a high  
19 affinity K<sup>+</sup> transporter), *KAT3/AtKCI* (a general regulatory negatively modulating many  
20 inward Shaker K<sup>+</sup> channels), and *CHX20* (a Na<sup>+</sup>(K<sup>+</sup>)/H<sup>+</sup> antiporter) are absent in *C. australis*.  
21 The following orthologs important for P uptake are also lost: *PHO2* (P uptake and  
22 translocation), *PHT2;1* (a chloroplast P transporter), and *SPX3* (P signaling). Several genes  
23 involved in N uptake are missing as well, such as the orthologs of *NAXT1* (a nitrate efflux  
24 transporter), and *NLP7* (a positive regulator for nitrate-induced gene expression); moreover,

1 while the low-affinity nitrate transporters *NRT1.1* and *1.2* are retained, the high-affinity  
2 nitrate transporters *NRT2.1* and *2.2* and *NRT3.1* are absent.

### 3 **Loss of photosynthesis genes**

4 *C. australis* has very limited photosynthetic capability (Supplementary Fig. 7).  
5 Among 248 photosynthesis-related genes in *Arabidopsis* annotated by GO, 38 *C. australis*  
6 orthologs are missing (Supplementary Data 1c). The plastome of *C. australis* (Supplementary  
7 Fig. 8) appears to have gene contractions (81 genes remain, while the plastome of *I. nil*  
8 harbors 104 genes), and is similar to those of the previously sequenced *Cuscuta* species<sup>11,12</sup>  
9 (Supplementary Data 4), especially *C. obtusiflora* and *C. gronovii*, all of these belong to the  
10 subgenus *Grammica* with *C. australis*. Notably, all these *Cuscuta* plastomes lack *ndh* genes  
11 encoding proteins for forming the NADH dehydrogenase complex functioning in electron  
12 cycling around photosystem I under stress. These data concur with the generally accepted  
13 notion that *ndh* genes are first to be lost in the initial stage in the evolution of parasitism,  
14 apparently due to relaxed selective constraint<sup>13</sup> (Supplementary Data 4).

### 15 **Loss of genes controlling flowering time**

16 Leaves play a critical role in perceiving environmental signals and thereby modulate  
17 the physiology of their own as well as other plant parts, such as activating flowering<sup>14</sup>. We  
18 speculate that the leafless dodders may have unique means of regulating flowering time and  
19 many flowering time-control genes may have been lost. A database of flowering time gene  
20 networks in *Arabidopsis* was recently constructed<sup>15</sup>. We found that among the 295 coding  
21 genes listed in this database, 26 are lost (Supplementary Data 1c), including the well-known  
22 *FLC*, *FRI*, *SVP*, *AGL17*, and *CO* (Fig. 3b). Moreover, the circadian clock genes *ELF3* and *4*,  
23 *ARR3* and *4*, and *CDF1* and *3* are also missing. *FKF1* and *CIB1*, which are essential in the  
24 photoperiod pathway, are also lost (Fig. 3b). Flowering time is controlled by multiple



1 pathways<sup>16</sup>, and it appears that the vernalization, temperature, autonomous, circadian clock,  
2 and photoperiod pathway all seem to be nonfunctional (Fig. 3b). The regulation of *C.*  
3 *australis* flowering time is particularly interesting to explore further.

#### 4 **Loss of defense-related genes**

5 Leaves and roots are the most common sites of pathogen and insect infestation. We  
6 speculate that after the ancestor of *Cuscuta* became leaf- and rootless, reduced exposure to  
7 pathogens and insects relaxed selective constraints on defense-related genes, resulting in their  
8 eventual loss. Specifically, four gene families were inspected in detail (Fig. 3c). *R*  
9 (*resistance*) genes are the critical components of plant immunity. Even though there is a  
10 possibility that the ancestor of Convolvulaceae experienced a reduction of *R* genes after the  
11 split between Convolvulaceae and other Solanales lineages, as *I. nil* has the smallest number  
12 of *R* genes (148; Supplementary Data 3b) among the 7Ref-Species, the reduction of *R* genes  
13 in *Cuscuta* is still drastic: *C. australis* genome harbors only 15 *R* genes (Fig. 3c and  
14 Supplementary Data 3b). Terpenes function as defenses against insects and pathogens. We  
15 predicted 9 terpene synthase genes (*TPSs*) in *C. australis*, and there are 31 to 60 *TPSs* in the  
16 7Ref-Species (Supplementary Data 3c). Many P450 enzymes are involved in the biosynthesis  
17 of plant secondary metabolites, which are required for adaptation to biotic and abiotic  
18 stresses<sup>17</sup>. While more than 240 P450s are encoded by the genomes of the 7Ref-Species, *C.*  
19 *australis* genome harbors only 89 (Supplementary Data 3d). Receptor-like kinases (RLKs)  
20 are important in plant development and resistance to abiotic and biotic stresses. *C. australis*  
21 genome comprises only 339 *RLK* genes, much less than in the 7Ref-Species (at least 655 in  
22 potato) (Supplementary Data 3e). Consistently, several well-studied genes in plant resistance  
23 to pathogens are also absent in *C. australis*, including *EDS1*, *EDS5*, *FMO1*, *SAG101*, and

1 *PAD4*, which are essential for plant resistance to diseases, and *ALDI*, which is critical for  
2 systemic acquired resistance.

### 3 **Origin of haustorium**

4 The haustorium is a parasitic plant-specific organ, playing a critical role in  
5 establishing parasitism. *C. australis* and *C. pentagona* RNA-seq data<sup>6</sup> were assembled using  
6 the *C. australis* genome as the reference (mapping ratios 96 and 75%, respectively;  
7 Supplementary Table 9). In *Cuscuta* prehaustoria and haustoria, we identified 2466  
8 principally expressed genes (PEGs; at least one-fold greater than the average of the  
9 expression levels in all the other tissues) belonging to 1299 orthogroups (Supplementary Data  
10 1d, Supplementary Data 3f). GO analysis on these PEGs indicated enrichment of biological  
11 processes of metabolic process, transport, lignin and xyloglucan metabolism, and  
12 transcriptional regulation genes (Supplementary Data 2d). This is consistent with the  
13 haustorial function of transporting host substances and the findings that dynamic cell wall  
14 remodeling in parasite haustoria is important in the establishment of parasitism<sup>18-20</sup>. The  
15 biggest proportion of these 1299 corresponding orthologs' principally expressed tissues in *S.*  
16 *lycopersicum* and *I. nil* were found to be the roots (Supplementary Fig. 9, Supplementary  
17 Data 1d). These data imply that the evolution of *Cuscuta* haustorium may be related to  
18 expression changes of genes involved in root development. Similarly, comparative  
19 transcriptome analyses on three root parasites, *Triphysaria versicolor*, *Striga hermonthica*,  
20 and *Phelipanche aegyptiaca*, revealed that parasitism genes are derived primarily from root  
21 and floral tissues<sup>18</sup>.

22 Next, we performed a HYPHY analysis to obtain the genes that underwent positive  
23 selection and relaxed purifying selection after the divergence between the ancestors of  
24 *Cuscuta* and *Ipomoea* lineage, as these genes might be associated with the speciation of

1 *Cuscuta* and evolution of parasitism. GO terms including “response to hormones”, “DNA  
2 methylation”, “regulation of transcription”, and “cell wall-related metabolism” were enriched  
3 from the 1124 positively selected genes (Supplementary Data 3g, Supplementary Data 2e),  
4 and among these, 115 are principally expressed in prehaustoria/haustoria (Supplementary  
5 Data 3f), including a pectin esterase, receptor-like kinases, transcription factors, a serine  
6 carboxypeptidase, and transporters. We also found that 3890 genes (Supplementary Data 3h)  
7 exhibited signatures of relaxed purifying selection. The enriched GO terms include  
8 “terpenoid biosynthetic process”, “nitrate assimilation”, “photosystem II assembly”, and  
9 “regulation of signal transduction” (Supplementary Data 2f), and 504 genes with relaxed  
10 purifying selection (Supplementary Data 3f) are principally expressed in  
11 prehaustoria/haustoria, such as genes encoding subtilisin-like proteases and an ABC  
12 transporter.

13         Gene family expansion, mainly caused by gene duplication, often leads to  
14 neofunctionalization among the gene family members and is thought to be an important  
15 driving force in the acquisition of novel phenotypes. Thus, we performed GO analysis on the  
16 3099 expanded gene family members of *C. australis* (Supplementary Data 3i, Supplementary  
17 Data 2g). It was found that “response to auxin” and “DNA methylation” were enriched from  
18 the members of expanded gene families; among them, 109 are principally expressed in  
19 prehaustoria/haustoria (Supplementary Data 3f). These data are consistent with the finding  
20 that many haustorial genes in Orobanchaceae parasites also experienced relaxed purifying  
21 and/or positive selection and may play an important role in the evolution of the parasitic  
22 lifestyle<sup>18</sup>.

23         Five positively selected genes from the expanded gene families were found to be  
24 principally expressed in haustoria (Supplementary Fig. 10. and Supplementary Data 3f).

1 Among these, one encodes a putative  $\alpha/\beta$ -hydrolase highly similar to *Nicotiana sylvestris*  
2 DAD2/DWARF14 (84% identity), which is the strigolactone receptor in autotrophic plants,  
3 implying that neofunctionalization of  $\alpha/\beta$ -hydrolase genes might also be involved in the  
4 parasitization process in *Cuscuta*, as they are in the root parasites *Striga* and *Orobanche*<sup>21</sup>.

## 5 **Discussions**

6 How plants evolved parasitism is still unclear. Our transcriptomic data and molecular  
7 evolution analysis suggest convergent evolution in *Cuscuta* and Orobanchaceae root  
8 parasites<sup>18</sup>. The haustorium of *Cuscuta* probably evolved from root tissues and that of  
9 Orobanchaceae parasites recruited genes normally involved in the development of root and  
10 floral tissues. Moreover, a relatively large fraction of the genes that experienced positive  
11 selection and/or relaxed selection are principally expressed in prehaustoria/haustoria in both  
12 *Cuscuta* and Orobanchaceae, and these genes may be related to parasitization and/or  
13 evolution of parasitism.

14 Our comparative genomic analyses indicate that the *C. australis* genome experienced  
15 remarkably high levels of contraction, and this is consistent with *Cuscuta*'s parasitic lifestyle  
16 and large changes in body plan – leaf- and rootless as well as intensive dependence on host-  
17 derived metabolites and signals. Given the importance of new genes that bring about novel  
18 phenotypes, it is possible that the autotrophic ancestor evolved haustorium from root tissues  
19 through the neofunctionalization of duplicated genes and transcriptional reprogramming in  
20 the *Cuscuta* lineage. *Cuscuta* is transitioning from hemiparasites to holoparasites. Among the  
21 recognized major parasite lineages, three contain only hemiparasites, while eight are solely  
22 holoparasites<sup>1</sup>, implying that holoparasitization may have additional selective advantages  
23 over hemiparasitization. Hypothetically, the dramatic changes in body plans, including the  
24 degeneration of leaf and root could allow these parasites to reallocate carbon and nitrogen

1 resources, that are required for their development and growth, to reproduction and could also  
2 enable the holoparasites to better adjust their physiology according to that of the hosts by  
3 eavesdropping on host signaling molecules.

4 Wicke et al.<sup>13</sup> analyzed the plastomes of nonparasitic, hemiparasitic, and  
5 nonphotosynthetic parasitic plants in Orobanchaceae, and found that the transition from  
6 autotrophic plant to obligate parasites relaxes functional constraints on plastid genes in a  
7 stepwise manner. Similar analyses could not be done in *Cuscuta*, as it is the only parasitic  
8 lineage in the Convolvulaceae. The large body plan changes that were associated with the  
9 parasitic lifestyle relaxed selective constraints on several core pathways, such as  
10 photosynthesis<sup>13</sup>, flowering time control, root and leaf development, nutrient acquirement,  
11 and defense against pathogens and insects. Under relaxed selection pressure, some genes of  
12 these pathways were pseudogenized and melted into the background of surrounding DNA  
13 because of accumulation of recurrent mutations, or were even deleted from the genome,  
14 finally leading to gene losses. In *C. australis* genome, 1168 genes were identified as  
15 pseudogenes, although some may still be functional or even have gained new functions<sup>22</sup>. It is  
16 likely that the majority of these pseudogenes are degenerated or in the process of being  
17 deleted, following the fate of the lost genes. Indeed, *C. australis* genes have undergone  
18 relaxed purifying selection include those related to terpenoid biosynthetic process (defense),  
19 nitrate assimilation (nutrient acquirement), and photosystem II assembly (photosynthesis).  
20 Resequencing of other *Cuscuta* species may shed light on the recent gene loss events and the  
21 underlying mechanisms (e.g., transposon insertion, fragment deletion, and rapid accumulation  
22 of mutations) in *Cuscuta*.

23 Large scale gene loss is also evident from the genomic data of human parasites  
24 *Pediculus humanus humanus* (body louse)<sup>23</sup>, *Trichinella spiralis* (a zoonotic nematode)<sup>24</sup>, and

1 *Giardia lamblia* (an intestinal protist)<sup>25</sup>, and from an *Arabidopsis* pathogen, the obligate  
2 biotrophic oomycete *Hyaloperonospora arabidopsidis*<sup>26</sup>. Here, we also detected that *U. gibba*  
3 also experienced a large number of gene loss events during its evolution, likely resulting from  
4 its body plan changes (mainly loss of root) and lifestyle alteration (carnivory). It would also  
5 be of importance to compare the genomes of *Cuscuta* and those of Orobanchaceae root  
6 parasites. We expect that Orobanchaceae parasites, especially holoparasites, such as  
7 *Orobanche* species, may also have a large number of lost nuclear genes, some of which may  
8 bear the same functions as those in *Cuscuta*, such as the genes that function in leaf  
9 development and photosynthesis. The *C. australis* genomic data strongly support the notion  
10 that regressive evolution, which is associated with extensive gene loss, is likely to be  
11 pervasive and adaptive during the evolution of holo- /obligate parasites<sup>27,28</sup>. Comparative  
12 genomics between the genome data of *C. australis* and autotrophic plants provides an  
13 important resource for studying genome reduction, regressive evolution, parasitism, and evo-  
14 devo in plant parasites.

## 15 **Methods**

16 **DNA sample preparation and sequencing.** The seeds of *Cuscuta australis* were originally  
17 purchased from a Chinese traditional medicinal herbs store in Kunming, China, in 2011, and  
18 had been cultivated for five generations in a glasshouse at the Kunming Institute of Botany,  
19 Chinese Academy of Sciences. Voucher specimens of *C. australis* can be accessed at the  
20 Herbarium of the Kunming Institute of Botany, Chinese Academy of Sciences (accessions Nos.  
21 WJQ-001-1 and WJQ-001-3). Seedlings were prepared from seeds of the fifth generation and  
22 were infested on soybean plants (for the germination procedure, see Li et al.<sup>29</sup>). DNA isolated  
23 from young vines collected from one individual *Cuscuta australis* was isolated for genomic  
24 library construction. Three genomic DNA libraries with 350-bp, 2-kb, or 5-kb insertions were

1 constructed for Illumina sequencing. For PacBio sequencing, five DNA libraries with 20-kb  
2 insertions were sequenced on a PacBio RS II instrument using the P6v2 polymerase binding  
3 and C4 chemistry kits (P6-C4). A total of 26.6 Gb from 1,953,966 reads were obtained by  
4 processing 24 single-molecule real-time (SMRT) cells. The average and N50 of SMRT subread  
5 length were 9.6 kb and 13.6 kb, respectively.

6 **Transcriptome sample preparation and sequencing.** *Cuscuta australis* tissues of seeds, just-  
7 germinated seeds (one day after imbibing), seedlings (five days after imbibing), prehaustoria,  
8 haustoria, stems far from haustoria, stems near haustoria, flower buds, flowers, and seed  
9 capsules were collected and RNA samples were extracted from these tissues using the TRI  
10 Reagent (Sigma). Libraries were constructed for each tissue according to the TrueSeq® RNA  
11 Sample Preparation protocol, and sequenced on an Illumina HiSeq-2500. Sequences are  
12 deposited in NCBI under BioProject PRJNA394036.

13 *Cuscuta pentagona* transcriptomic short reads dataset from Ranjan et al.<sup>6</sup> were retrieved from  
14 the NCBI Short Read Archive under accession numbers SRR965929, SRR965963,  
15 SRR966236, SRR966405, SRR966412, SRR966513, SRR966542, SRR966549, SRR966619  
16 to SRR966622, SRR967154, SRR967164, SRR967181 to SRR967190, SRR967275 to  
17 SRR967289, and SRR967291.

18 **Genome survey.** We used 23.29 Gb of HiSeq reads to estimate the genome features using the  
19 GCE<sup>30</sup> (v1.0.0) software based on *k*-mer depth-frequency distribution. A total of  
20 11,700,637,064 17-mers were counted. Given the unique *k*-mer depth of 42, we calculated that  
21 the genome size =  $\text{KmerCount}/\text{Depth} = 272.57$  Mb. The repeat content was estimated to be  
22 58.94% based on *k*-mer depth distribution.

23 **De novo assembly.** SMRT reads were corrected, trimmed, and assembled using CANU<sup>31</sup>  
24 (v1.3), a genome assembler built on the basis of Celera assembler. Briefly, SMRT reads were

1 firstly self-corrected based on an overlap-layout algorithm. Erroneous regions of error-  
2 corrected SMRT reads were then trimmed to increase accuracy. We constructed an initial  
3 assembly using CANU with those trimmed error-corrected SMRT reads following the  
4 parameters “genomeSize=273m errorRate=0.025” and then used Quiver<sup>32</sup> (v4.0) to generate  
5 consensus sequences by aligning SMRT reads to correct the errors in the assembly. Lastly, we  
6 used Pilon<sup>33</sup> (v1.18) to perform the second round of error correction with HiSeq reads from the  
7 350-bp-insert library. The resulted error-corrected assembly was named version 1.0 and used  
8 in the subsequent analyses. A hierarchical method was also applied to concatenate adjacent  
9 contigs: SSPACE<sup>34</sup> (v 3.0) was first used to build scaffolds using HiSeq data from the mate-  
10 pair libraries and the contigs built from the PacoBio data. N50 of the resulted scaffolds reached  
11 5.9 Mb. SSPACE-LongRead<sup>35</sup> (v1-1) was further applied to build superscaffolds with PacBio  
12 long reads, nevertheless, no linking information between scaffolds were found and no  
13 improvements were acquired (Supplementary Table 1).

14 **Assembly assessment.** The accuracy and heterozygosity rate of the genome assembly were  
15 estimated using the following procedure: Adaptors were removed from the short paired-end  
16 reads obtained from the 350-bp insert size library, and then the reads were aligned to the PacBio  
17 assembly, which had been corrected with Pilon<sup>33</sup> (v1.18), using bowtie2<sup>36</sup> (v 2.2.4) to generate  
18 a bam file. A total of 97.9% reads could be mapped. Samtools<sup>37</sup> (v 1.3.1) were used to sort bam  
19 file, and Freebayes<sup>38</sup> (v1.1.0) was applied to call variants. Compared with PacBio assembly as  
20 the reference genome, homozygous SNPs or indels were considered to be assembly errors, and  
21 heterozygous SNPs or indels were regarded as heterozygous sites. The accuracy was estimated  
22 to be 99.99% and heterozygosity was estimated to be 0.013% (Supplementary Table 3). Error  
23 rate of the genome assembly before Pilon correction was also estimated using the same set of  
24 methods. A total of 980 SNPs and 101825 Indels were corrected after polishing.



1 **Data availability.** The genome assembly, gene models, and sequence reads are available at the  
2 NCBI under the BioProject PRJNA394036  
3 [<https://www.ncbi.nlm.nih.gov/bioproject/PRJNA394036>], and the former two can also be  
4 accessed at <http://www.dodderbase.org>. Phylogenetic analysis data for detection of gene losses,  
5 gene alignments used for selection analysis, and pseudogene annotations can be accessed at  
6 <https://doi.org/10.6084/m9.figshare.6072131>. All data are also available from the  
7 corresponding author upon request.

8

9

## 1   **References**

- 2   1    Westwood, J. H., Yoder, J. I., Timko, M. P. & dePamphilis, C. W. The evolution of  
3    parasitism in plants. *Trends Plant Sci* **15**, 227-235, doi:10.1016/j.tplants.2010.01.004  
4    (2010).
- 5   2    Yoshida, S., Cui, S., Ichihashi, Y. & Shirasu, K. The haustorium, a specialized  
6    invasive organ in parasitic plants. *Annu Rev Plant Biol* **67**, 643-667,  
7    doi:10.1146/annurev-arplant-043015-111702 (2016).
- 8   3    Kim, G., LeBlanc, M. L., Wafula, E. K., Depamphilis, C. W. & Westwood, J. H.  
9    Genomic-scale exchange of mRNA between a parasitic plant and its hosts. *Science*  
10   **345**, 808-811, doi:10.1126/science.1253122 (2014).
- 11   4    Birschwilks, M., Haupt, S., Hofius, D. & Neumann, S. Transfer of phloem-mobile  
12    substances from the host plants to the holoparasite *Cuscuta* sp. *J Exp Bot* **57**, 911-921,  
13    doi:10.1093/Jxb/Erj076 (2006).
- 14   5    Smith, J. D., Woldemariam, M. G., Mescher, M. C., Jander, G. & De Moraes, C. M.  
15    Glucosinolates from host plants influence growth of the parasitic plant *Cuscuta*  
16    *gronovii* and its susceptibility to aphid feeding. *Plant Physiol* **172**, 181-197,  
17    doi:10.1104/pp.16.00613 (2016).
- 18   6    Ranjan, A. *et al.* De novo assembly and characterization of the transcriptome of the  
19    parasitic weed dodder identifies genes associated with plant parasitism. *Plant Physiol*  
20    **166**, 1186-1199, doi:10.1104/pp.113.234864 (2014).
- 21   7    Estep, M. C., Gowda, B. S., Huang, K., Timko, M. P. & Bennetzen, J. L. Genomic  
22    characterization for parasitic weeds of the genus *Striga* by sample sequence analysis.  
23    *Plant Genome-Us* **5**, 30-41, doi:10.3835/plantgenome2011.11.0031 (2012).
- 24   8    Bromham, L., Cowman, P. F. & Lanfear, R. Parasitic plants have increased rates of  
25    molecular evolution across all three genomes. *BMC Evol Biol* **13**, 126,  
26    doi:10.1186/1471-2148-13-126 (2013).
- 27   9    Hoshino, A. *et al.* Genome sequence and analysis of the Japanese morning glory  
28    Ipomoea nil. *Nat Commun* **7**, 13295, doi:10.1038/ncomms13295 (2016).
- 29   10    Simao, F. A., Waterhouse, R. M., Ioannidis, P., Kriventseva, E. V. & Zdobnov, E. M.  
30    BUSCO: assessing genome assembly and annotation completeness with single-copy  
31    orthologs. *Bioinformatics* **31**, 3210-3212, doi:10.1093/bioinformatics/btv351 (2015).
- 32   11    Funk, H. T., Berg, S., Krupinska, K., Maier, U. G. & Krause, K. Complete DNA  
33    sequences of the plastid genomes of two parasitic flowering plant species, *Cuscuta*  
34    *reflexa* and *Cuscuta gronovii*. *BMC Plant Biol* **7**, 45, doi:10.1186/1471-2229-7-45  
35    (2007).
- 36   12    McNeal, J. R., Arumugunathan, K., Kuehl, J. V., Boore, J. L. & Depamphilis, C. W.  
37    Systematics and plastid genome evolution of the cryptically photosynthetic parasitic  
38    plant genus *Cuscuta* (Convolvulaceae). *BMC Biol* **5**, 55, doi:10.1186/1741-7007-5-55  
39    (2007).
- 40   13    Wicke, S. *et al.* Mechanistic model of evolutionary rate variation en route to a  
41    nonphotosynthetic lifestyle in plants. *P Natl Acad Sci USA* **113**, 9045-9050,  
42    doi:10.1073/pnas.1607576113 (2016).
- 43   14    Putterill, J. & Varkonyi-Gasic, E. FT and florigen long-distance flowering control in  
44    plants. *Curr Opin Plant Biol* **33**, 77-82, doi:10.1016/j.pbi.2016.06.008 (2016).
- 45   15    Bouche, F., Lobet, G., Tocquin, P. & Perilleux, C. FLOR-ID: an interactive database  
46    of flowering-time gene networks in *Arabidopsis thaliana*. *Nucleic Acids Res* **44**,  
47    D1167-1171, doi:10.1093/nar/gkv1054 (2016).

- 1 16 Romera-Branchat, M., Andres, F. & Coupland, G. Flowering responses to seasonal  
2 cues: what's new? *Curr Opin Plant Biol* **21**, 120-127, doi:10.1016/j.pbi.2014.07.006  
3 (2014).
- 4 17 Morant, M., Bak, S., Moller, B. L. & Werck-Reichhart, D. Plant cytochromes P450:  
5 tools for pharmacology, plant protection and phytoremediation. *Curr Opin Biotechnol*  
6 **14**, 151-162 (2003).
- 7 18 Yang, Z. *et al.* Comparative transcriptome analyses reveal core parasitism genes and  
8 suggest gene duplication and repurposing as sources of structural novelty. *Mol Biol*  
9 *Evol* **32**, 767-790, doi:10.1093/molbev/msu343 (2014).
- 10 19 Johnsen, H. R. *et al.* Cell wall composition profiling of parasitic giant dodder  
11 (*Cuscuta reflexa*) and its hosts: a priori differences and induced changes. *The New*  
12 *phytologist* **207**, 805-816, doi:10.1111/nph.13378 (2015).
- 13 20 Olsen, S. *et al.* Getting ready for host invasion: elevated expression and action of  
14 xyloglucan endotransglucosylases/hydrolases in developing haustoria of the  
15 holoparasitic angiosperm *Cuscuta*. *J Exp Bot* **67**, 695-708, doi:10.1093/jxb/erv482  
16 (2016).
- 17 21 Conn, C. E. *et al.* PLANT EVOLUTION. Convergent evolution of strigolactone  
18 perception enabled host detection in parasitic plants. *Science* **349**, 540-543,  
19 doi:10.1126/science.aab1140 (2015).
- 20 22 Balakirev, E. S. & Ayala, F. J. Pseudogenes: Are They “Junk” or Functional DNA?  
21 *Annual Review of Genetics* **37**, 123-151,  
22 doi:10.1146/annurev.genet.37.040103.103949 (2003).
- 23 23 Kirkness, E. F. *et al.* Genome sequences of the human body louse and its primary  
24 endosymbiont provide insights into the permanent parasitic lifestyle. *P Natl Acad Sci*  
25 *USA* **107**, 12168-12173, doi:10.1073/pnas.1003379107 (2010).
- 26 24 Mitreva, M. *et al.* The draft genome of the parasitic nematode *Trichinella spiralis*.  
27 *Nat Genet* **43**, 228-U274, doi:10.1038/ng.769 (2011).
- 28 25 Morrison, H. G. *et al.* Genomic minimalism in the early diverging intestinal parasite  
29 *Giardia lamblia*. *Science* **317**, 1921-1926, doi:10.1126/science.1143837 (2007).
- 30 26 Baxter, L. *et al.* Signatures of adaptation to obligate biotrophy in the  
31 *Hyaloperonospora arabidopsidis* Genome. *Science* **330**, 1549-1551,  
32 doi:10.1126/science.1195203 (2010).
- 33 27 Albalat, R. & Canestro, C. Evolution by gene loss. *Nat Rev Genet* **17**, 379-391,  
34 doi:10.1038/nrg.2016.39 (2016).
- 35 28 Wolf, Y. I. & Koonin, E. V. Genome reduction as the dominant mode of evolution.  
36 *Bioessays* **35**, 829-837, doi:10.1002/bies.201300037 (2013).
- 37 29 Li, J. *et al.* The Parasitic Plant *Cuscuta australis* Is Highly Insensitive to Abscisic  
38 Acid-Induced Suppression of Hypocotyl Elongation and Seed Germination. *Plos One*  
39 **10**, e0135197, doi:10.1371/journal.pone.0135197 (2015).
- 40 30 Liu, B. *et al.* Estimation of genomic characteristics by analyzing k-mer frequency in  
41 de novo genome projects. Preprint at <http://arXiv:1308.2012> (2012).
- 42 31 Koren, S. *et al.* Canu: scalable and accurate long-read assembly via adaptive k-mer  
43 weighting and repeat separation. *Genome Res* **27**, 722-736,  
44 doi:10.1101/gr.215087.116 (2017).
- 45 32 Chin, C. S. *et al.* Nonhybrid, finished microbial genome assemblies from long-read  
46 SMRT sequencing data. *Nat Methods* **10**, 563-+, doi:10.1038/Nmeth.2474 (2013).
- 47 33 Walker, B. J. *et al.* Pilon: An Integrated Tool for Comprehensive Microbial Variant  
48 Detection and Genome Assembly Improvement. *Plos One* **9**,  
49 doi:10.1371/journal.pone.0112963 (2014).

- 1 34 Boetzer, M., Henkel, C. V., Jansen, H. J., Butler, D. & Pirovano, W. Scaffolding pre-  
2 assembled contigs using SSPACE. *Bioinformatics* **27**, 578-579,  
3 doi:10.1093/bioinformatics/btq683 (2011).
- 4 35 Boetzer, M. & Pirovano, W. SSPACE-LongRead: scaffolding bacterial draft genomes  
5 using long read sequence information. *BMC Bioinformatics* **15**, 211,  
6 doi:10.1186/1471-2105-15-211 (2014).
- 7 36 Langmead, B. & Salzberg, S. L. Fast gapped-read alignment with Bowtie 2. *Nat*  
8 *Methods* **9**, 357-359, doi:10.1038/nmeth.1923 (2012).
- 9 37 Li, H. *et al.* The Sequence Alignment/Map format and SAMtools. *Bioinformatics* **25**,  
10 2078-2079, doi:10.1093/bioinformatics/btp352 (2009).
- 11 38 Garrison E, M. G. Haplotype-based variant detection from short-read sequencing.  
12 *arXiv preprint arXiv:1207.3907 [q-bio.GN]* (2012).  
13

14

1 **Acknowledgments** This work was supported by the Strategic Priority Research Program of  
2 the Chinese Academy of Sciences (CAS) (No. XDB11050200; J.W.). We also thank Drs. Lei  
3 Wang (Institute of Botany, CAS), Hongtao Liu (Institute of Plant Physiology and Ecology,  
4 CAS), Jinyong Hu and Chengjun Zhang (Kunming Institute of Botany, CAS), and Zhaojun  
5 Ding (Shandong University) for valuable comments.

6 **Author Contributions** J.W., G.S., and Y.X. designed and conceived research; T.S., C.H.,  
7 G.S., prepared plant tissues; W.C. performed photosynthesis experiments; T.S., and Y.Q.  
8 prepared DNA samples; J.L. and J.Q. prepared RNA samples; Y.X., and H.L. performed  
9 genome assembly and genome annotation; Y.X., H.L., and T.S. analyzed data; J.W., G.S.,  
10 Y.X., H.L., J.Z., L.W., I.T.B., and Z.G. wrote the paper. All authors read and approved the  
11 final manuscript.

12 **Competing financial interests** The authors declare no competing financial interests.

### 13 **Materials & Correspondence**

14 *C. australis* seeds can be distributed by Dr. Jianqiang Wu (Kunming Institute of  
15 Botany, Chinese Academy of Sciences, email: wujianqiang@mail.kib.ac.cn) upon request.

16

1 **Figure 1 | Morphological traits and genome structure of *C. australis*.** **a**, Photographs of *C.*  
2 *australis* seed (1), seedling (2), vines twining around the wild tomato *Solanum pennellii* (3 &  
3 4; partial haustoria can be seen in 3), flowers (5), and seed capsules (6). **b**, Phylogenetic tree  
4 generated from genome-wide one-to-one orthogroups (bootstrap values for all clades are  
5 100%). **c**, Circos plot of a set of syntenic genome segments of *C. australis*, Japanese morning  
6 glory, and coffee. Numbers besides terminals of each karyotype denote the start and end of  
7 chromosome segment or contigs with unit of Mb. **d**, Numbers of gene clades (shown on top  
8 of the trees) supporting different hypotheses on the order of speciation and whole-genome  
9 triplication event in the *Cuscuta* and *Ipomoea* lineage.

10

11

12

1 **Figure 2 | Expansion and contraction in *C. australis* gene families.** **a**, Significantly  
2 expanded and contracted gene families. Brackets above each branch indicate numbers of  
3 expanded (in black, before comma) and contracted (in red, after comma) gene families. **b**,  
4 Tukey boxplot overview of the differences among the gene numbers of the conserved gene  
5 families, based on the *F*-index values (*F*-indices range from 0 to 1; when  $F =, <, \text{ or } > 0.5$ , the  
6 gene number in the given gene family is equal to, smaller, or greater than the average size of  
7 this gene family in all species). The left and right sides of the boxes are the first and third  
8 quartiles, respectively; means and medians of the data are shown as an “×” and the bands in  
9 the boxes, respectively; for each box, the whiskers represent the smallest and biggest datum  
10 that are still within 1.5 times interquartile range of the lower and upper quartile, and the  
11 outliers are shown as dots.  
12

1 **Figure 3 | Gene losses in *C. australis*.** **a**, The principally expressed tissues (PETs) of the  
2 respective orthologs of *C. australis* lost genes in *S. lycopersicum* and *I. nil*. The boxes  
3 represent different tissues. The respective PETs of the orthogroups, which have no *C.*  
4 *australis* members, were identified in *S. lycopersicum* and *I. nil*. The numbers of orthogroups,  
5 which have PETs in leaves, roots, flowers, and other tissues, are shown in the boxes, and the  
6 respective percentages (proportional to the areas of the boxes) indicate the ratios between  
7 these indicated numbers and the numbers of all orthogroups whose PETs were identified to  
8 be the corresponding tissues of *I. nil* and *S. lycopersicum*. **b**, Simplified gene network  
9 controlling flowering time. Genes in green boxes are retained in *C. australis*, and the lost  
10 ones are in red boxes. Arrows and T-ends represent promoting and inhibiting genetic  
11 interactions, respectively, and round dots at both ends symbolize genetic interactions with  
12 unknown directions. **c**, Numbers of genes in the gene families of *R* genes, *TPSs*, *P450s*, and  
13 *RLKs*.



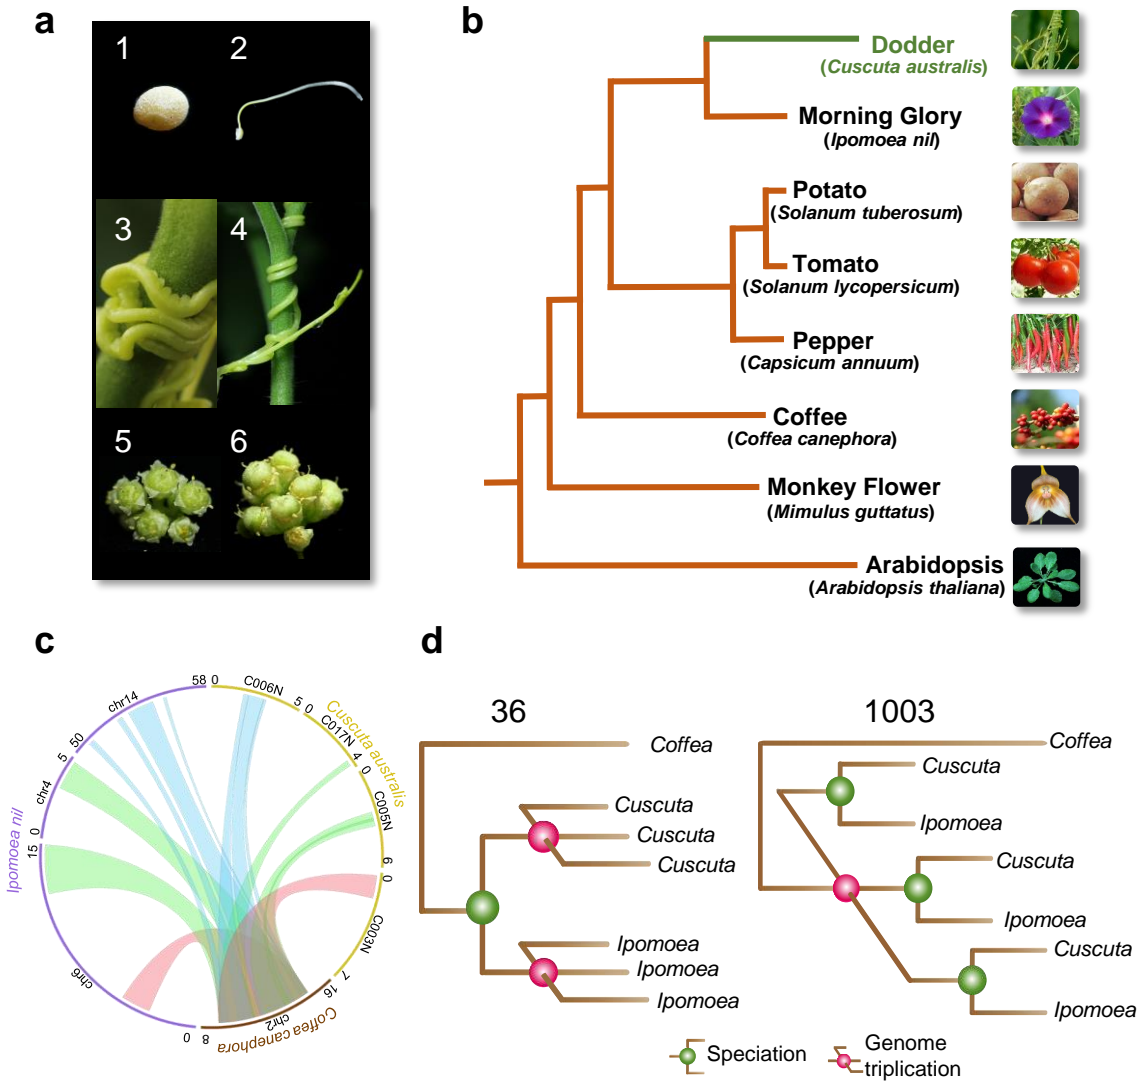

**Figure 1 | Morphological traits and genome structure of *C. australis*.** **a**, Photographs of *C. australis* seed (1), seedling (2), vines twining around the wild tomato *Solanum pennellii* (3 & 4; partial haustoria can be seen in 3), flowers (5), and seed capsules (6). **b**, Phylogenetic tree generated from genome-wide one-to-one orthogroups (bootstrap values for all clades are 100%). **c**, Circos plot of a set of syntenic genome segments of *C. australis*, Japanese morning glory, and coffee. Numbers besides terminals of each karyotype denote the start and end of chromosome segment or contigs with unit of Mb. **d**, Numbers of gene clades (shown on top of the trees) supporting different hypotheses on the order of speciation and whole-genome triplication event in the *Cuscuta* and *Ipomoea* lineage.

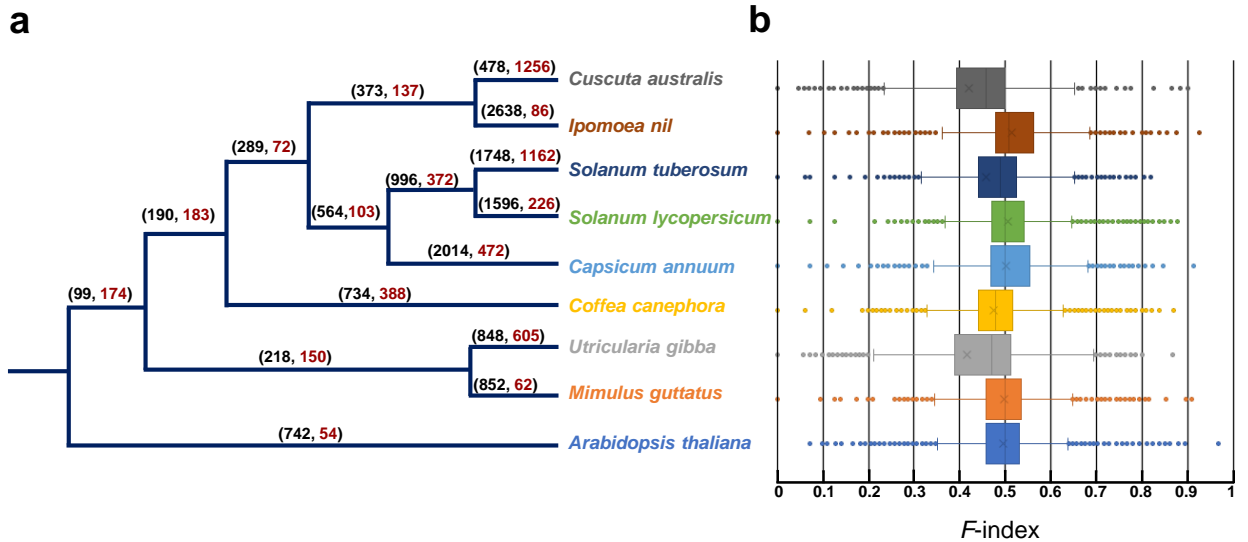

**Figure 2 | Expansion and contraction in *C. australis* gene families. a**, Significantly expanded and contracted gene families. Brackets above each branch indicate numbers of expanded (in black, before comma) and contracted (in red, after comma) gene families. **b**, Tukey boxplot overview of the differences among the gene numbers of the conserved gene families, based on the F-index values (F-indices range from 0 to 1; when  $F =$ ,  $<$ , or  $>$  0.5, the gene number in the given gene family is equal to, smaller, or greater than the average size of this gene family in all species). The left and right sides of the boxes are the first and third quartiles, respectively; means and medians of the data are shown as an "x" and the bands in the boxes, respectively; for each box, the whiskers represent the smallest and biggest datum that are still within 1.5 times interquartile range of the lower and upper quartile, and the outliers are shown as dots.

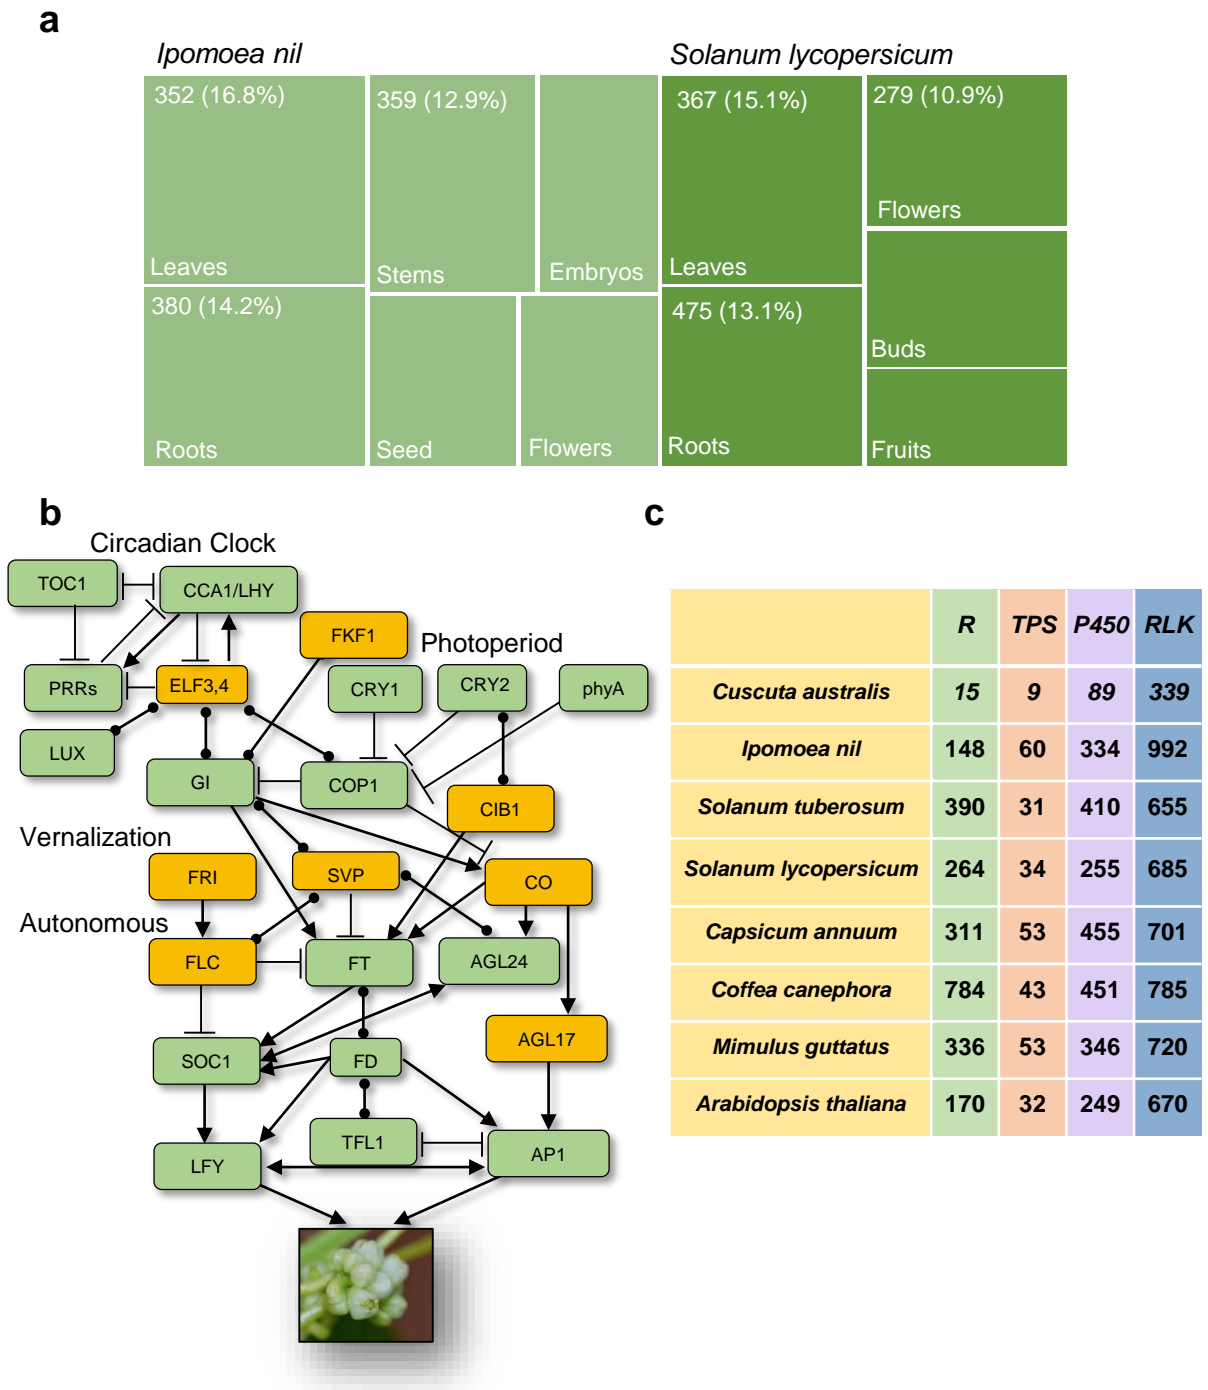

**Figure 3 | Gene losses in *C. australis*.** **a**, The principally expressed tissues (PETs) of the respective orthologs of *C. australis* lost genes in *S. lycopersicum* and *I. nil*. The boxes represent different tissues. The respective PETs of the orthogroups, which have no *C. australis* members, were identified in *S. lycopersicum* and *I. nil*. The numbers of orthogroups, which have PETs in leaves, roots, flowers, and other tissues, are shown in the boxes, and the respective percentages (proportional to the areas of the boxes) indicate the ratios between these indicated numbers and the numbers of all orthogroups whose PETs were identified to be the corresponding tissues of *I. nil* and *S. lycopersicum*. **b**, Simplified gene network controlling flowering time. Genes in green boxes are retained in *C. australis*, and the lost ones are in red boxes. Arrows and T-ends represent promoting and inhibiting genetic interactions, respectively, and round dots at both ends symbolize genetic interactions with unknown directions. **c**, Numbers of genes in the gene families of R genes, TPSs, P450s, and RLKs.
